# Supplementary material for: Outcome of CPAP Titration for Moderate-to-Severe OSA Under Drug-Induced Sleep Endoscopy: A Randomized Controlled Crossover Trial
Source: Frontiers journal article supplement (doi:10.3389/fneur.2022.882465), 2022-06-13
Supplement: Data_Sheet_1.PDF [file Data_Sheet_1.PDF]

Supplementary Figure 1: Whiskers: Min to Max: 95% CPAP pressure vs. collapse group

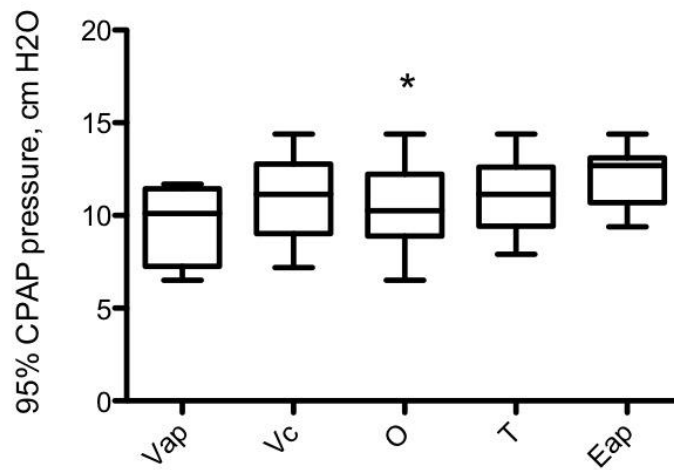

\*P<0.05, Eap vs. O

Supplementary Figure 2: Whiskers: Min to Max: Residual AHI vs. collapse group

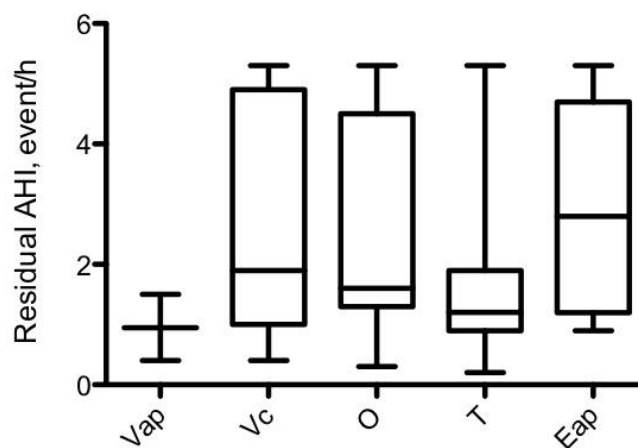

**Supplementary Table 1. Participant characteristics**

| Characteristics         | N = 24     |
|-------------------------|------------|
| Neck circumferences, cm | 39.9 ± 3.3 |
| <b>FTP</b>              |            |
| FTP I                   | 0 (0%)     |
| FTP II                  | 0 (0%)     |
| FTP III                 | 2 (8.3%)   |
| FTP IV                  | 22 (91.7%) |
| <b>TS</b>               |            |
| Grade 0                 | 3 (12.5%)  |
| Grade 1                 | 9 (37.5%)  |
| Grade 2                 | 6 (25.0%)  |
| Grade 3                 | 4 (16.7%)  |
| Grade 4                 | 2 (8.3%)   |

**FTP**, Friedman tongue position; I, uvula and tonsils completely visible; II, visible uvula and not tonsils; III, visible soft palate, but not uvula; and IV, visible only hard palate; **TS**, tonsil size; grade 0, absent; grade 1, behind tonsillar pillars; grade 2, extended to pillars; grade 3, visible beyond pillars; and grade 4, enlarged to midline.
